# Supplementary material
Source: PubMed Central journal article supplement (PMC8245161)

# Source Data - Extended Data Figure 5

**a**

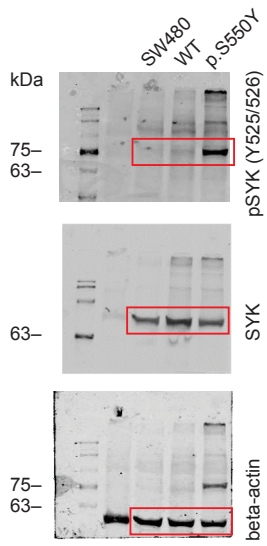

**b**

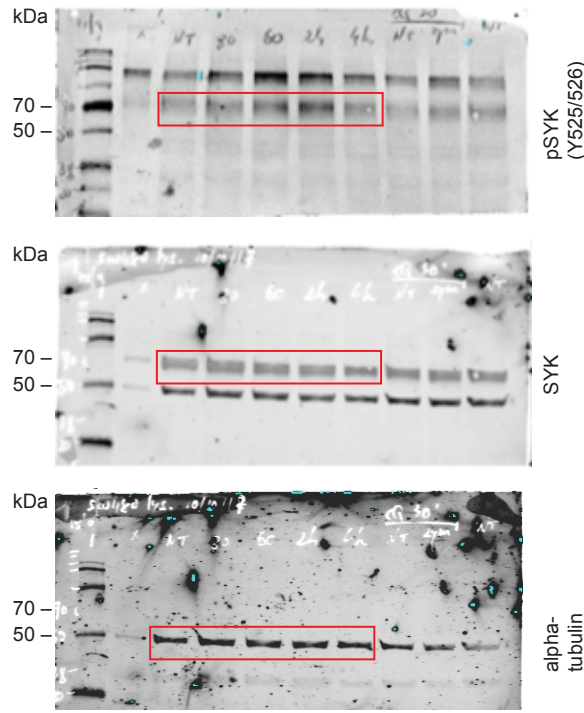

**c**

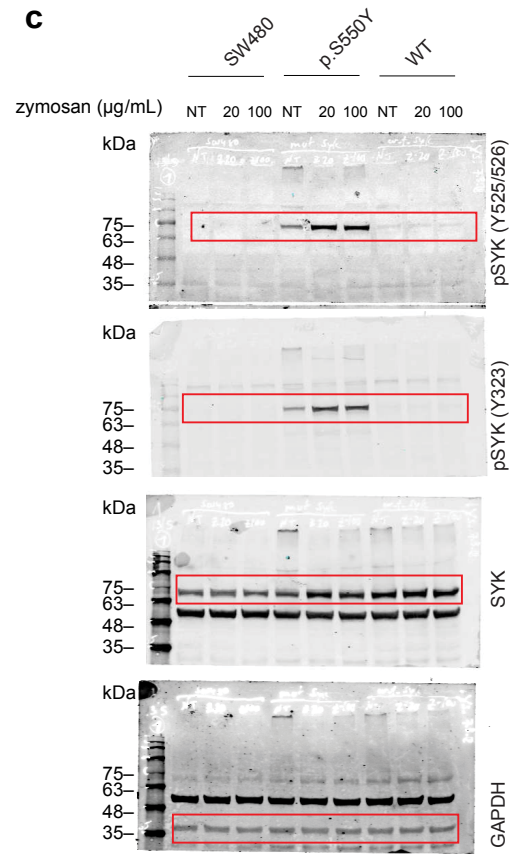

**d**

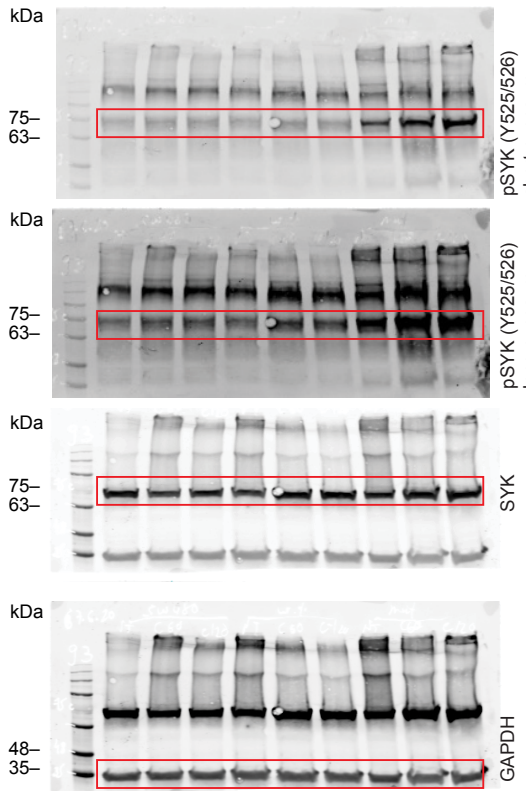

**e**

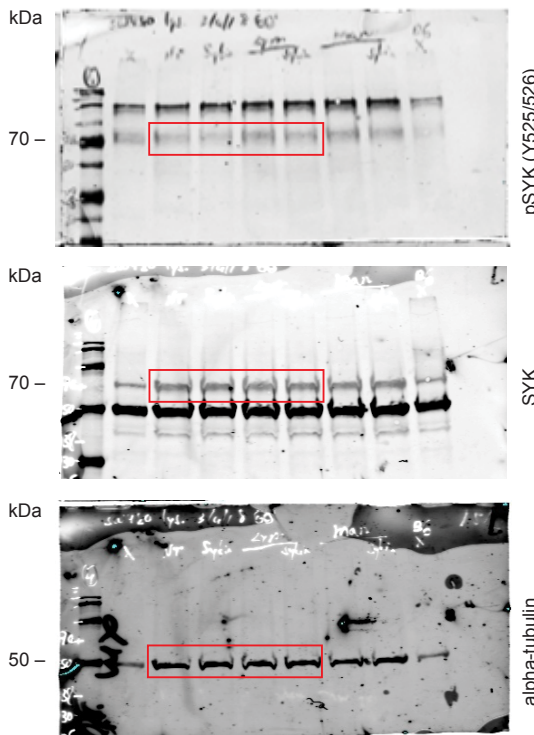

**f**

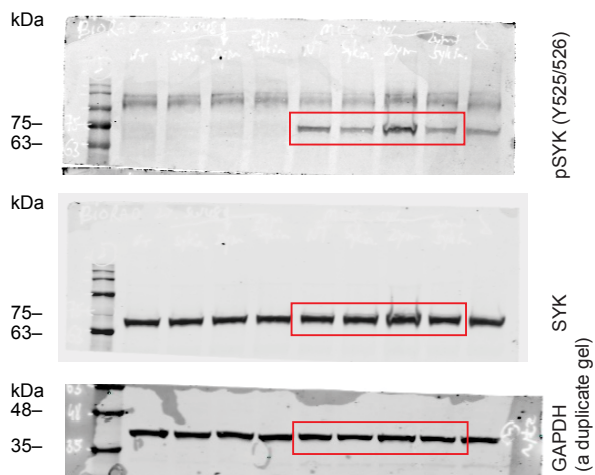

Supplement: NIHMS1667689-supplement-1667689_SourceData_ExtData_Fig5.pdf [file NIHMS1667689-supplement-1667689_SourceData_ExtData_Fig5.pdf]

# Source Data - Extended Data Figure 8

**a**

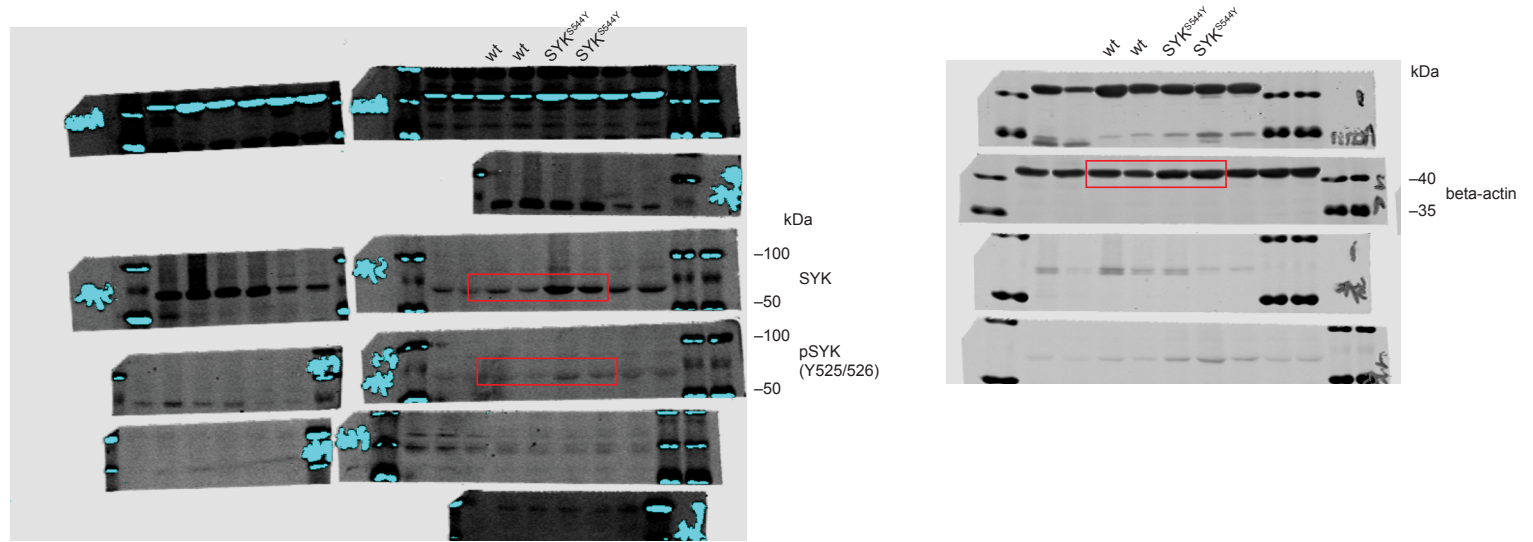

**d**

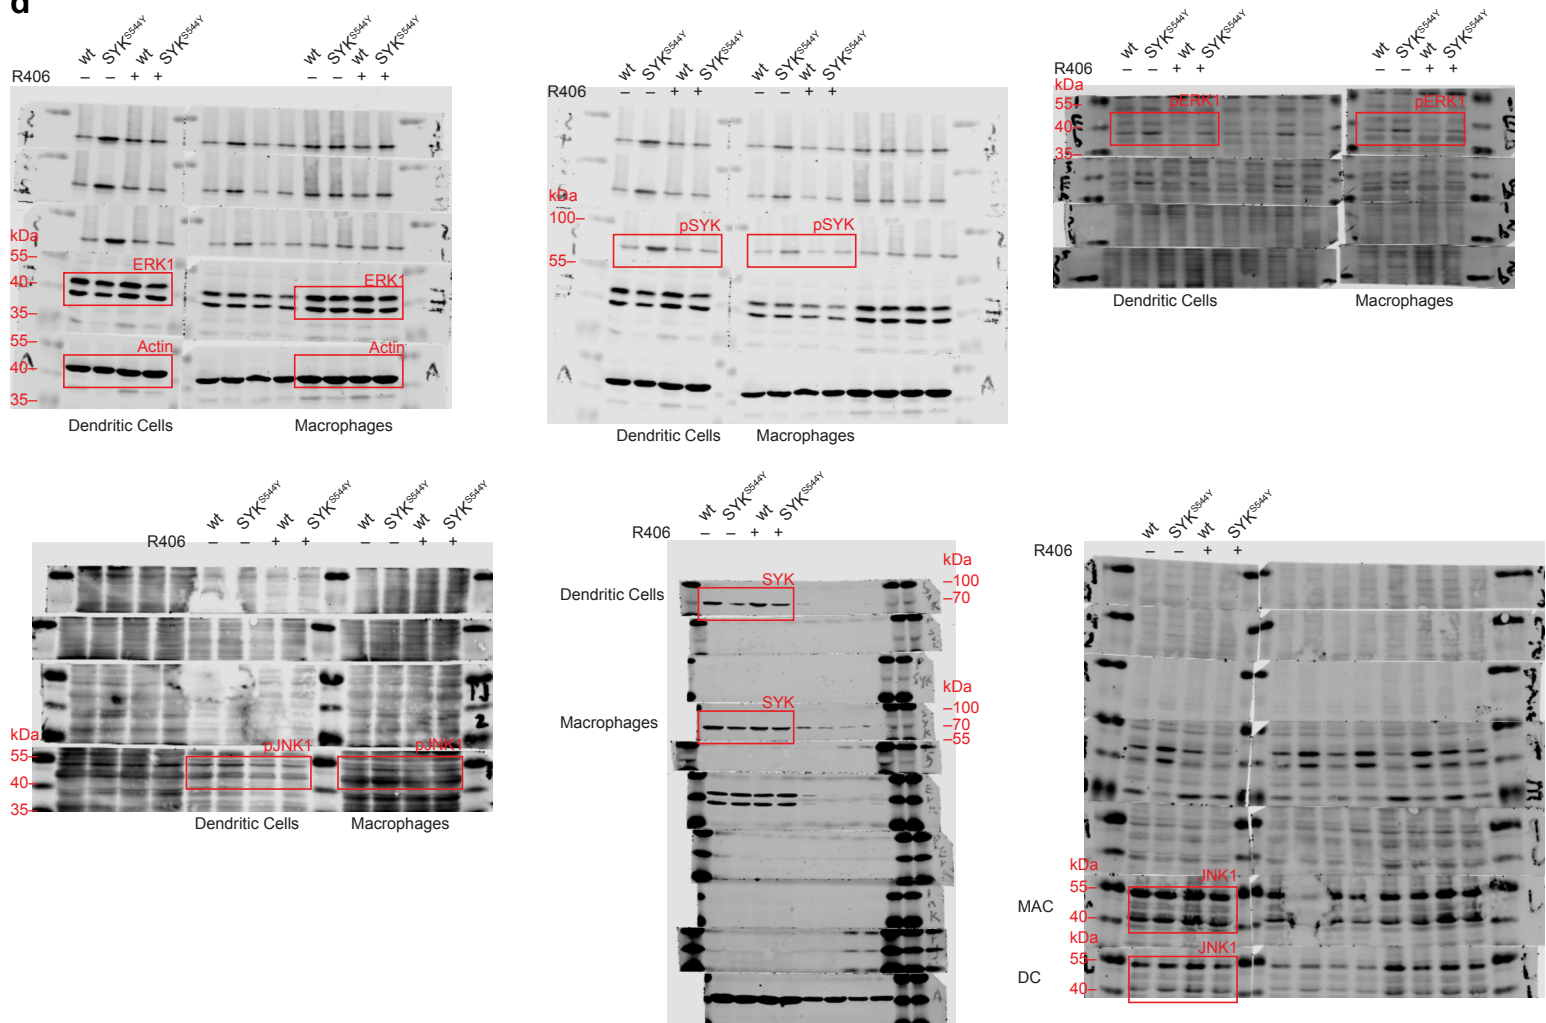

Supplement: NIHMS1667689-supplement-1667689_SourceData_ExtData_Fig8.pdf [file NIHMS1667689-supplement-1667689_SourceData_ExtData_Fig8.pdf]

# Source Data - Figure 2

**b**

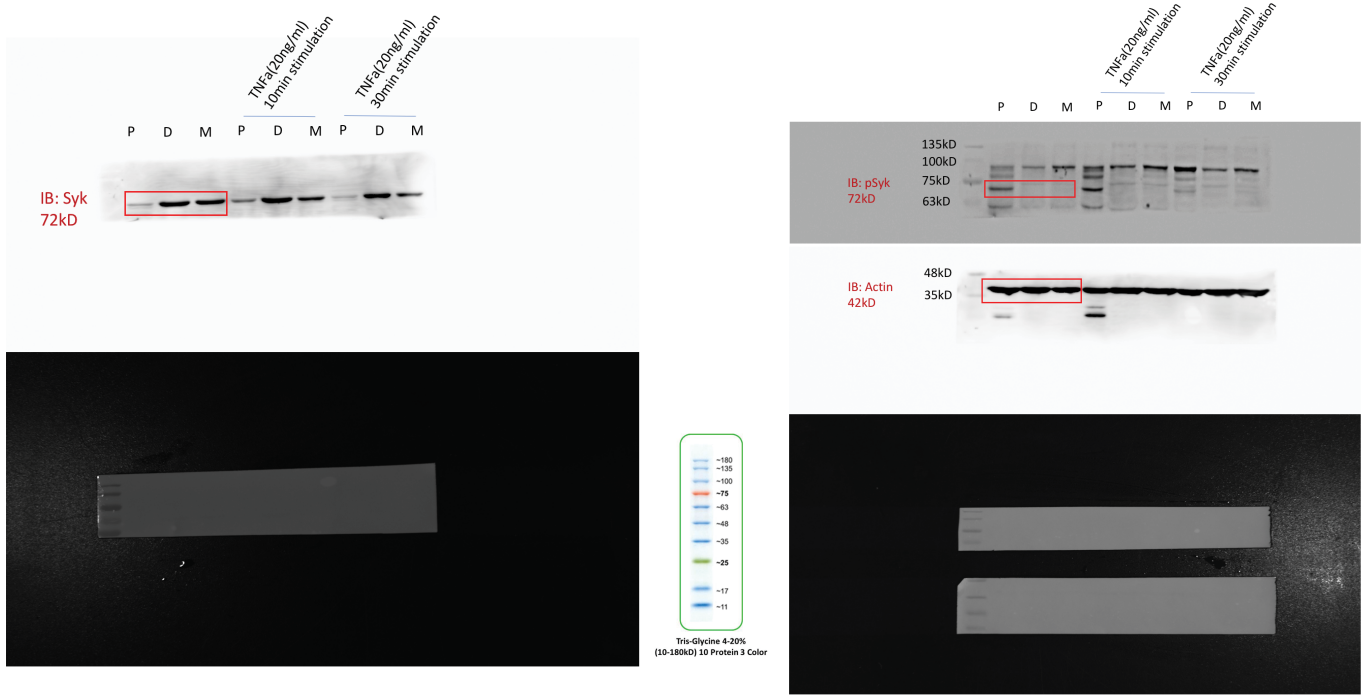

**d**

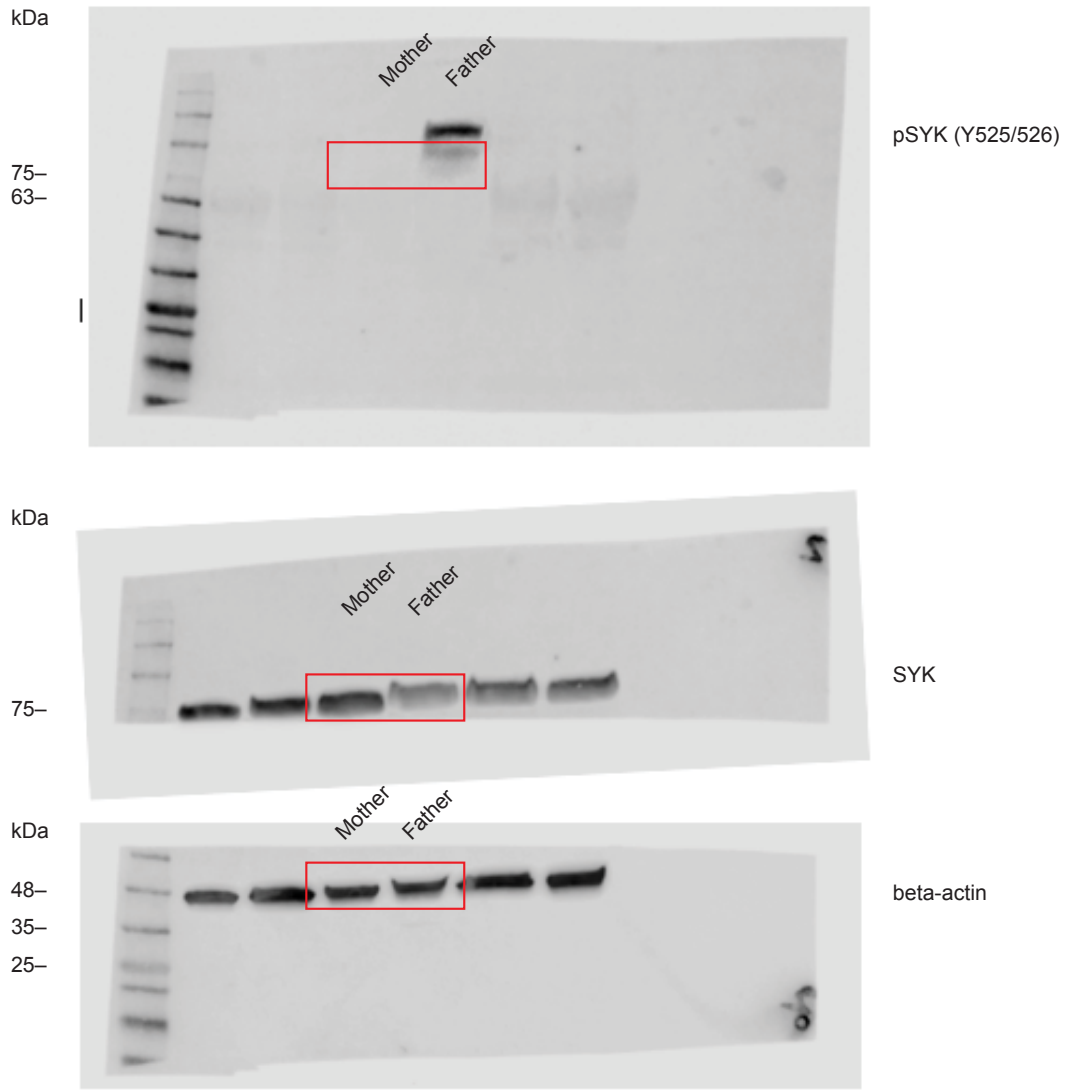

Supplement: NIHMS1667689-supplement-1667689_SourceData_Fig2.pdf [file NIHMS1667689-supplement-1667689_SourceData_Fig2.pdf]
